# Supplementary material for: Examination of the Novel Sigma-1 Receptor Antagonist, SI 1/28, for Antinociceptive and Anti-allodynic Efficacy against Multiple Types of Nociception with Fewer Liabilities of Use
Source: MDPI journal article supplement (doi:10.3390/ijms23020615), 2022-01-06
Supplement: s1 [file s1]

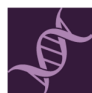

*Supplementary Materials*

# Examination of the Novel Sigma-1 Receptor Antagonist, SI 1/28, for Antinociceptive and Anti-allodynic Efficacy against Multiple Types of Nociception with Fewer Liabilities of Use

Lisa L. Wilson <sup>1</sup>, Shainnel O. Eans <sup>1</sup>, Insitar Ramadan-Siraj <sup>1</sup>, Maria N. Modica <sup>2</sup>, Giuseppe Romeo <sup>2</sup>, Sebastiano Intagliata <sup>2\*</sup> and Jay P. McLaughlin <sup>1\*</sup>

<sup>1</sup> Department of Pharmacodynamics, The University of Florida, Gainesville, FL 32610, USA; lisawilson@ufl.edu (L.L.W.); shaieans@cop.ufl.edu (S.O.E); I.SirajRamadan@hotmail.com (I.R.S.); jmclaughlin@cop.ufl.edu (J.P.M)

<sup>2</sup> Department of Drug and Health Sciences, University of Catania, 95125 Catania, Italy; mmodica@unict.it (M.N.M); gromeo@unict.it (G.R.); s.intagliata@unict.it (S.I.)

\* Correspondence: s.intagliata@unict.it; Tel.: +39-095-738-4053 (S.I.); jmclaughlin@cop.ufl.edu; +1-352-273-7207 (J.P.M)

## Table of contents

|                                                                                                                                         |    |
|-----------------------------------------------------------------------------------------------------------------------------------------|----|
| Synthetic procedure for the preparation of 1-(4-([4-(hydroxymethyl)phenyl]methyl)piperazin-1-yl)-5-phenylpentan-1-one oxalate (SI 1/28) | S2 |
| Figures S1, S2: <sup>1</sup> H NMR and APT spectra of SI 1/28                                                                           | S3 |
| Reference                                                                                                                               | S4 |

## Chemistry

All chemicals and solvents were reagent grade and were purchased from commercial vendors. Melting point was determined in an IA9200 Electrothermal apparatus equipped with a digital thermometer in glass capillary tubes and is uncorrected. The infrared (IR) spectrum was recorded in KBr disk on a Perkin Elmer 1600 Series FT-IR spectrometer.  $^1\text{H}$  NMR and  $^{13}\text{C}$  NMR spectra were recorded on a Varian Inova Unity 500 spectrometer, using a methanol- $d_4$  solution. Chemical shifts are given in  $\delta$  values (ppm), using tetramethylsilane as the internal standard; coupling constants ( $J$ ) are given in hertz (Hz). Signal multiplicities are characterized as s (singlet), t (triplet), m (multiplet), or br (broad signal). Elemental analysis for C, H, and N was within  $\pm 0.4\%$  of theoretical value and was performed on a Carlo Erba Elemental Analyzer Mod. 1108 apparatus.

*Synthesis of 1-(4-([4-(hydroxymethyl)phenyl]methyl)piperazin-1-yl)-5-phenylpentan-1-one oxalate (SI 1/28).* 1-(4-([4-(hydroxymethyl)phenyl]methyl)piperazin-1-yl)-5-phenylpentan-1-one free base was repurified in a bulk amount following a previously reported procedure [1]. Subsequently, a solution of oxalic acid (76.0 mg, 0.84 mmol) in methanol (1 mL) was poured into a stirred solution of the benzylpiperazine derivative (308.9 mg, 0.84 mmol) in methanol (1 mL). The mixed solution was stirred for 3 h, at room temperature, until the solution gradually became cloudy. Diethyl ether (15 mL) was then added, resulting in a white precipitate which was left to stand for 1 h to allow it to settle. The solid was collected by filtration under reduced pressure, washed twice with fresh diethyl ether, and dried to remove any residual traces of solvents to afford **SI 1/28** (238.6 mg, 62%) as a white pure solid. Mp: 144.7–145.9 °C; IR (KBr, selected lines)  $\text{cm}^{-1}$ : 3412, 2977, 1716, 1695, 1643, 1458, 1417, 1272, 1039, 720, 694.  $^1\text{H}$  NMR (500 MHz,  $\text{CD}_3\text{OD}$ ):  $\delta$  7.45 (br, 4H), 7.27 – 7.10 (m, 5H), 4.63 (s, 2H,  $\text{CH}_2\text{OH}$ ), 4.26 (s, 2H), 3.91 – 3.63 (m, 4H), 3.25 – 3.07 (m, 4H), 2.63 (t,  $J = 7.1$  Hz, 2H), 2.42 (t,  $J = 7.1$  Hz, 2H), 1.73 – 1.54 (m, 4H).  $^{13}\text{C}$  NMR (126 MHz,  $\text{CD}_3\text{OD}$ ):  $\delta$  174.0, 166.2, 145.0, 143.5, 132.3, 129.5, 129.4, 129.3, 128.5, 126.8, 64.5, 61.5, 52.6, 52.5, 43.8, 39.8, 36.5, 33.5, 32.1, 25.7. Anal. Calcd. for  $\text{C}_{23}\text{H}_{30}\text{N}_2\text{O}_2 \cdot \text{C}_2\text{H}_2\text{O}_4$ : C, 65.77; H, 7.07; N, 6.14. Found: C, 65.58; H, 7.10; N, 6.13.

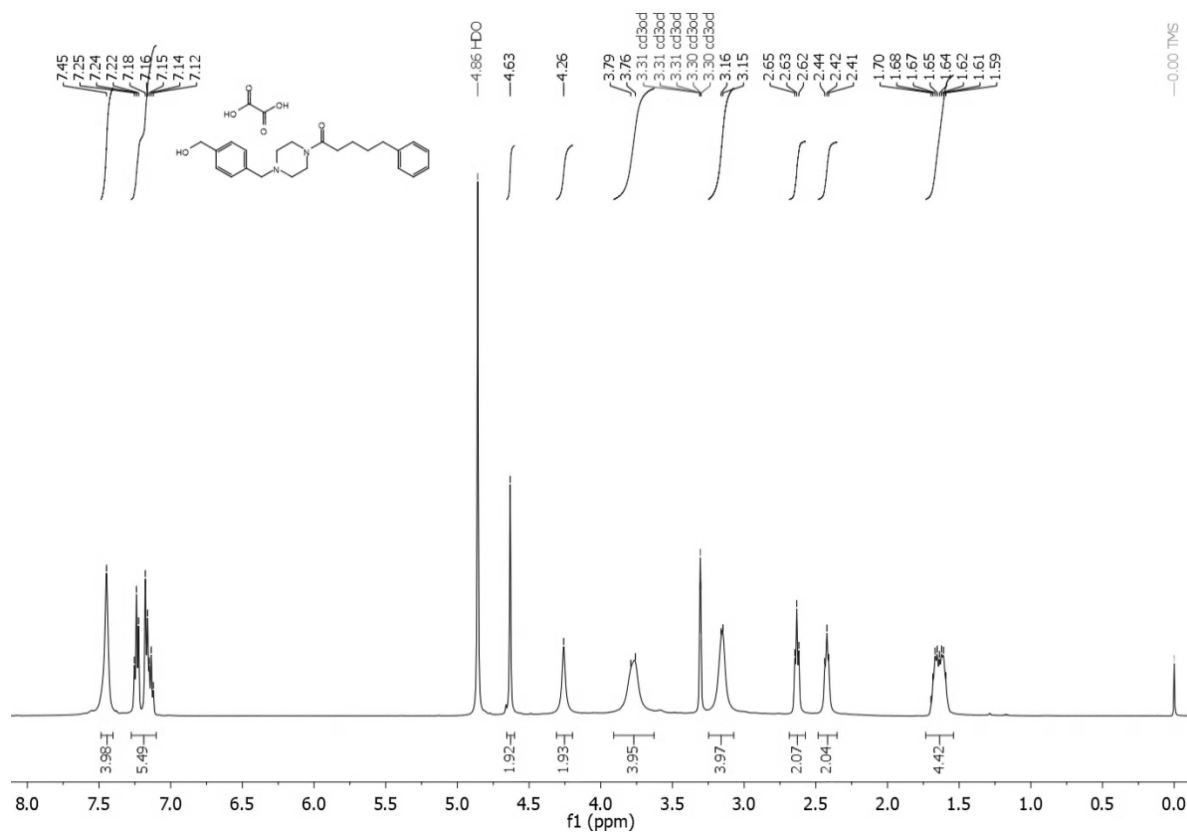

**Figure S1.**  $^1\text{H}$  NMR spectrum of SI 1/28

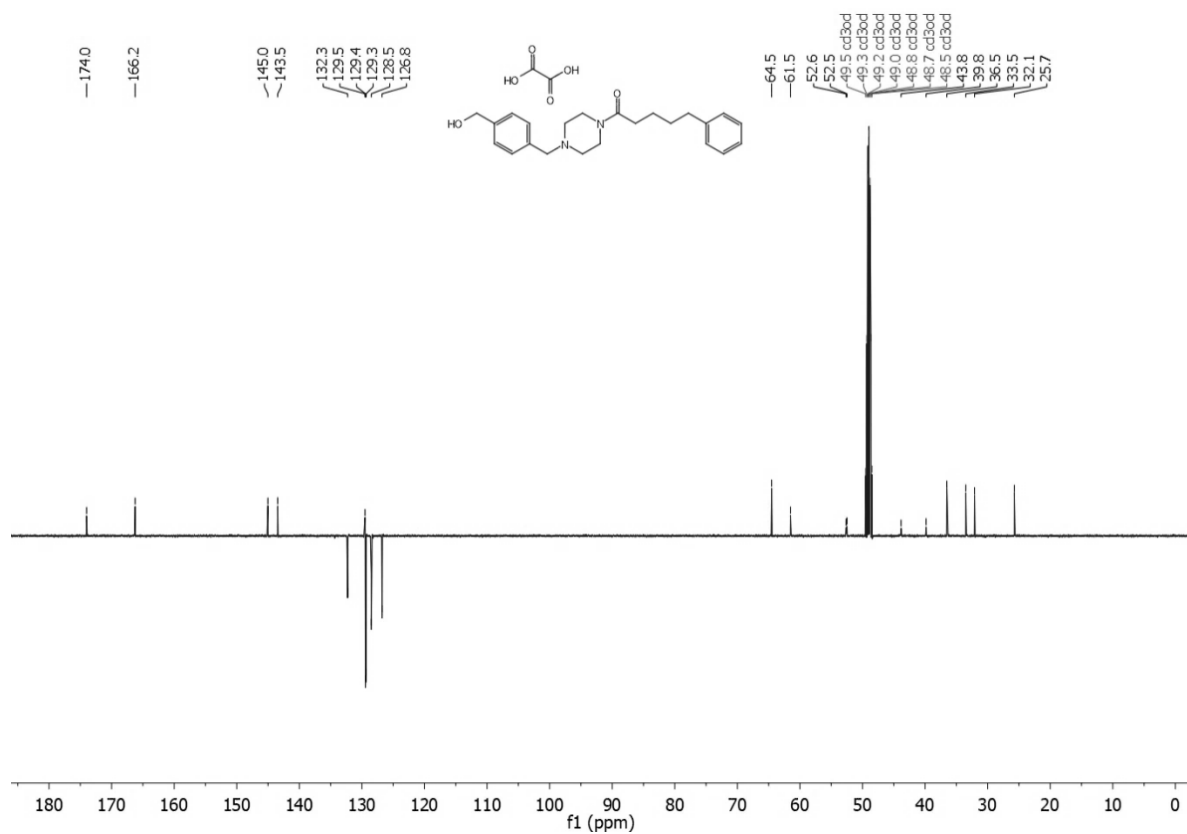

**Figure S2.** APT spectrum of SI 1/28

**Reference:**

1. Romeo, G.; Bonanno, F.; Wilson, L. L.; Arena, E.; Modica, M. N.; Pittalà, V.; Salerno, L.; Prezzavento, O.; McLaughlin, J. P.; Intagliata, S., Development of New Benzylpiperazine Derivatives as  $\sigma(1)$  Receptor Ligands with in Vivo Antinociceptive and Anti-Allodynic Effects. *ACS chemical neuroscience* **2021**, *12*, (11), 2003-2012.
